# Supplementary material
Source: PubMed Central journal article supplement (PMC10227723)
Supplement: NIHMS1831037-supplement-ESI.pdf [file NIHMS1831037-supplement-ESI.pdf]

*Supplemental information for:*

**A 3D-Printed, Multi-Modal Microfluidic Device for Measuring Nitric Oxide and ATP Release from Flowing Red Blood Cells**

Elizabeth A. Hayter,<sup>a</sup> Samuel Azibere,<sup>a</sup> Lauren A. Skrajewski,<sup>c</sup> Logan D. Soule,<sup>c</sup> Dana M. Spence,<sup>c</sup> and R. Scott Martin<sup>a,b\*</sup>

<sup>a</sup> Department of Chemistry, Saint Louis University

<sup>b</sup> Center for Additive Manufacturing, Saint Louis University

<sup>c</sup> Department of Biomedical Engineering, Institute for Quantitative Health Science & Engineering, Michigan State University

\*corresponding author:

Dr. R. Scott Martin

3501 Laclede Ave

St. Louis, MO, USA 63103

+1 314-977-2836

[scott.martin@slu.edu](mailto:scott.martin@slu.edu)

**Figure S1.** CAD designs of the double mixing T multi-modal device.

**Figure S2.** Characterization of mixing in the single mixing T device.

**Figure S3.** Effect of the luciferin/luciferase flow rate on peak height (ATP detection).

**Figure S4.** Interference plots for NO and ATP detection.

**Figure S5.** Standard addition plots for quantitating ATP in normoxic and hypoxic RBC solutions.

SI also contains .STL file of the double T device used in these studies.



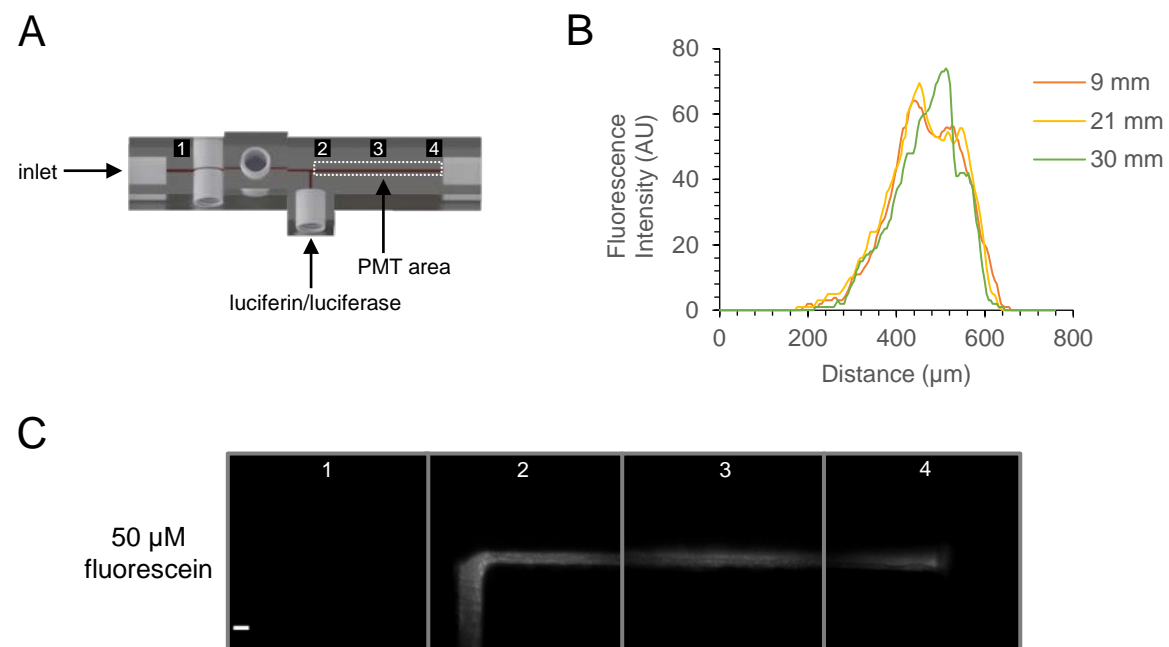

**Figure S2:** Characterization of mixing in the single mixing T device. A) CAD rendering of the device that illustrates the imaging points before and across the mixing channel. B) Graph showing the fluorescence intensity (line scan) across the mixing channel as a function of the distance downstream from the single T intersection. C) Micrographs of fluorescein at discrete imaging points before and across the mixing channel (scale bar = 100 μm).

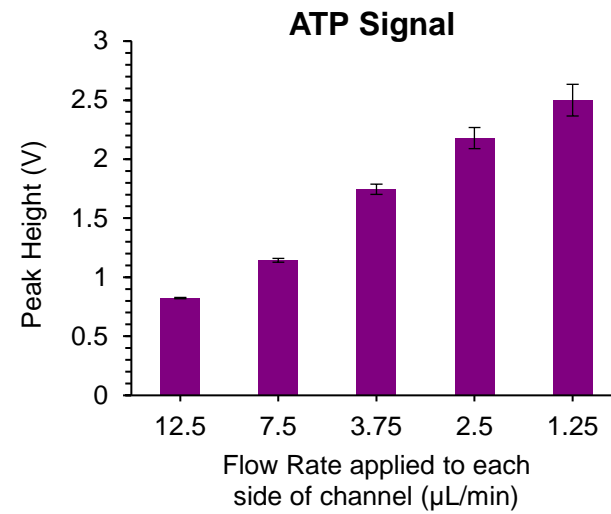

**Figure S3:** Effect of the luciferin/luciferase flow rate on peak height (ATP detection). The average response for 3 injections of a 2.5 μM ATP solution are shown for each flow rate (the reported flow rates were applied to each side channel).

A

| Sample | NO                    | ATP                   | NO and ATP                                    |
|--------|-----------------------|-----------------------|-----------------------------------------------|
| 1      | 0 $\mu\text{M}$ NO    | 0 $\mu\text{M}$ ATP   | 0 $\mu\text{M}$ NO + 0 $\mu\text{M}$ ATP      |
| 2      | 3.8 $\mu\text{M}$ NO  | 0.5 $\mu\text{M}$ ATP | 3.8 $\mu\text{M}$ NO + 0.5 $\mu\text{M}$ ATP  |
| 3      | 7.6 $\mu\text{M}$ NO  | 1.0 $\mu\text{M}$ ATP | 7.6 $\mu\text{M}$ NO + 1.0 $\mu\text{M}$ ATP  |
| 4      | 11.4 $\mu\text{M}$ NO | 1.5 $\mu\text{M}$ ATP | 11.4 $\mu\text{M}$ NO + 1.5 $\mu\text{M}$ ATP |
| 5      | 15.2 $\mu\text{M}$ NO | 2.0 $\mu\text{M}$ ATP | 15.2 $\mu\text{M}$ NO + 2.0 $\mu\text{M}$ ATP |
| 6      | 19 $\mu\text{M}$ NO   | 2.5 $\mu\text{M}$ ATP | 19 $\mu\text{M}$ NO + 2.5 $\mu\text{M}$ ATP   |

B

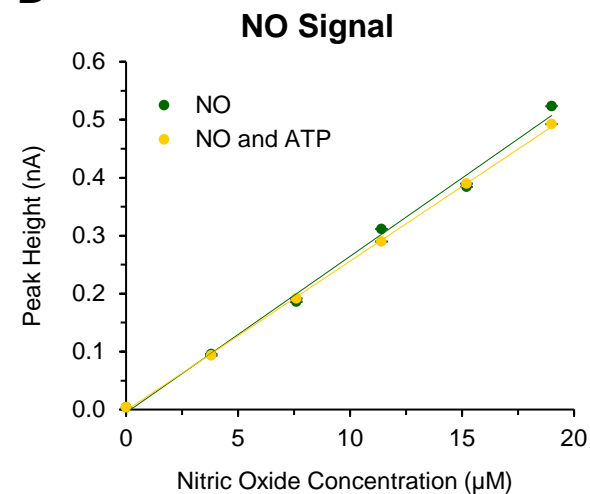

C

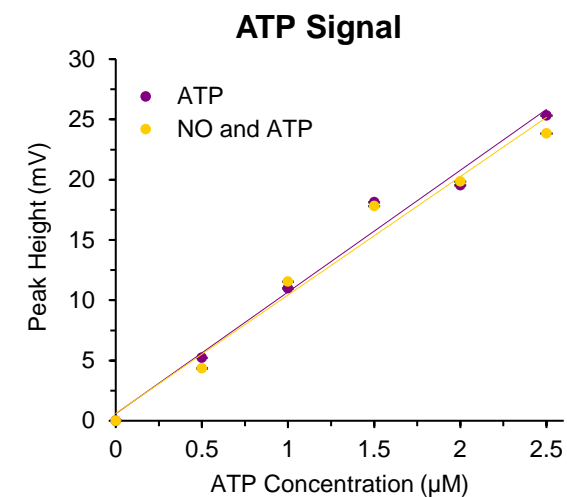

**Figure S4:** Interference plots for NO and ATP detection. A) Samples were made in PBS according to the table. B) Calibration curve for NO alone and for NO and ATP. C) Calibration curve for ATP alone and for NO and ATP.

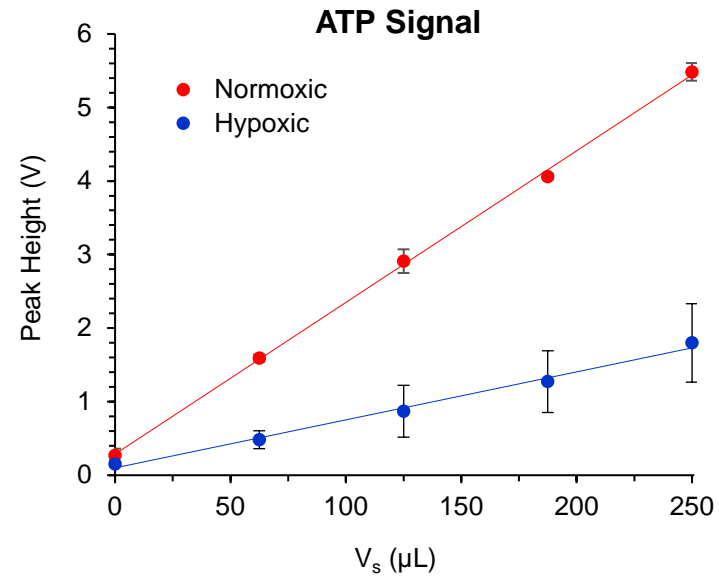

**Figure S5:** Standard addition plots for quantitating ATP in normoxic and hypoxic RBC solutions. Deoxygenated hemoglobin absorbs light at the maximum emission wavelengths of the luciferin/luciferase reaction, attenuating the signal and necessitating separate curves for normoxic and hypoxic measurements.
